# Supplementary material for: Variability of sinapic acid derivatives during germination and their contribution to antioxidant and anti-inflammatory effects of broccoli sprouts on human plasma and human peripheral blood mononuclear cells
Source: Royal Society of Chemistry journal article supplement (doi:10.1039/d0fo01387k), 2020-01-01
Supplement: d0fo01387k1.pdf [file d0fo01387k1.pdf]

**Variability of sinapic acid derivatives during germination and their contribution to antioxidant and anti-inflammatory effects of broccoli sprouts in human plasma and human peripheral blood mononuclear cells**

Monika Anna Olszewska<sup>a</sup>, Sebastian Granica<sup>b</sup>, Joanna Kolodziejczyk-Czepas<sup>c</sup>, Anna Magiera<sup>a</sup>, Monika Czerwińska<sup>b</sup>, Pawel Nowak<sup>c</sup>, Magdalena Rutkowska<sup>a</sup>, Piotr Wasiński<sup>a</sup>, Aleksandra Owczarek<sup>a1</sup>

<sup>a</sup> Department of Pharmacognosy, Faculty of Pharmacy, Medical University of Lodz, Muszynskiego 1, Lodz 90-151, Poland;

<sup>b</sup> Department of Pharmacognosy and Molecular Basis of Phytotherapy, Faculty of Pharmacy, Medical University of Warsaw, Banacha 1, 02-097 Warsaw, Poland;

<sup>c</sup> Department of General Biochemistry, Faculty of Biology and Environmental Protection, University of Lodz, Pomorska 141/143, 90-236 Lodz, Poland

**Supplementary Information**

---

<sup>1</sup> Corresponding author.

E-mail address: [aleksandra.owczarek@umed.lodz.pl](mailto:aleksandra.owczarek@umed.lodz.pl) (A. Owczarek)

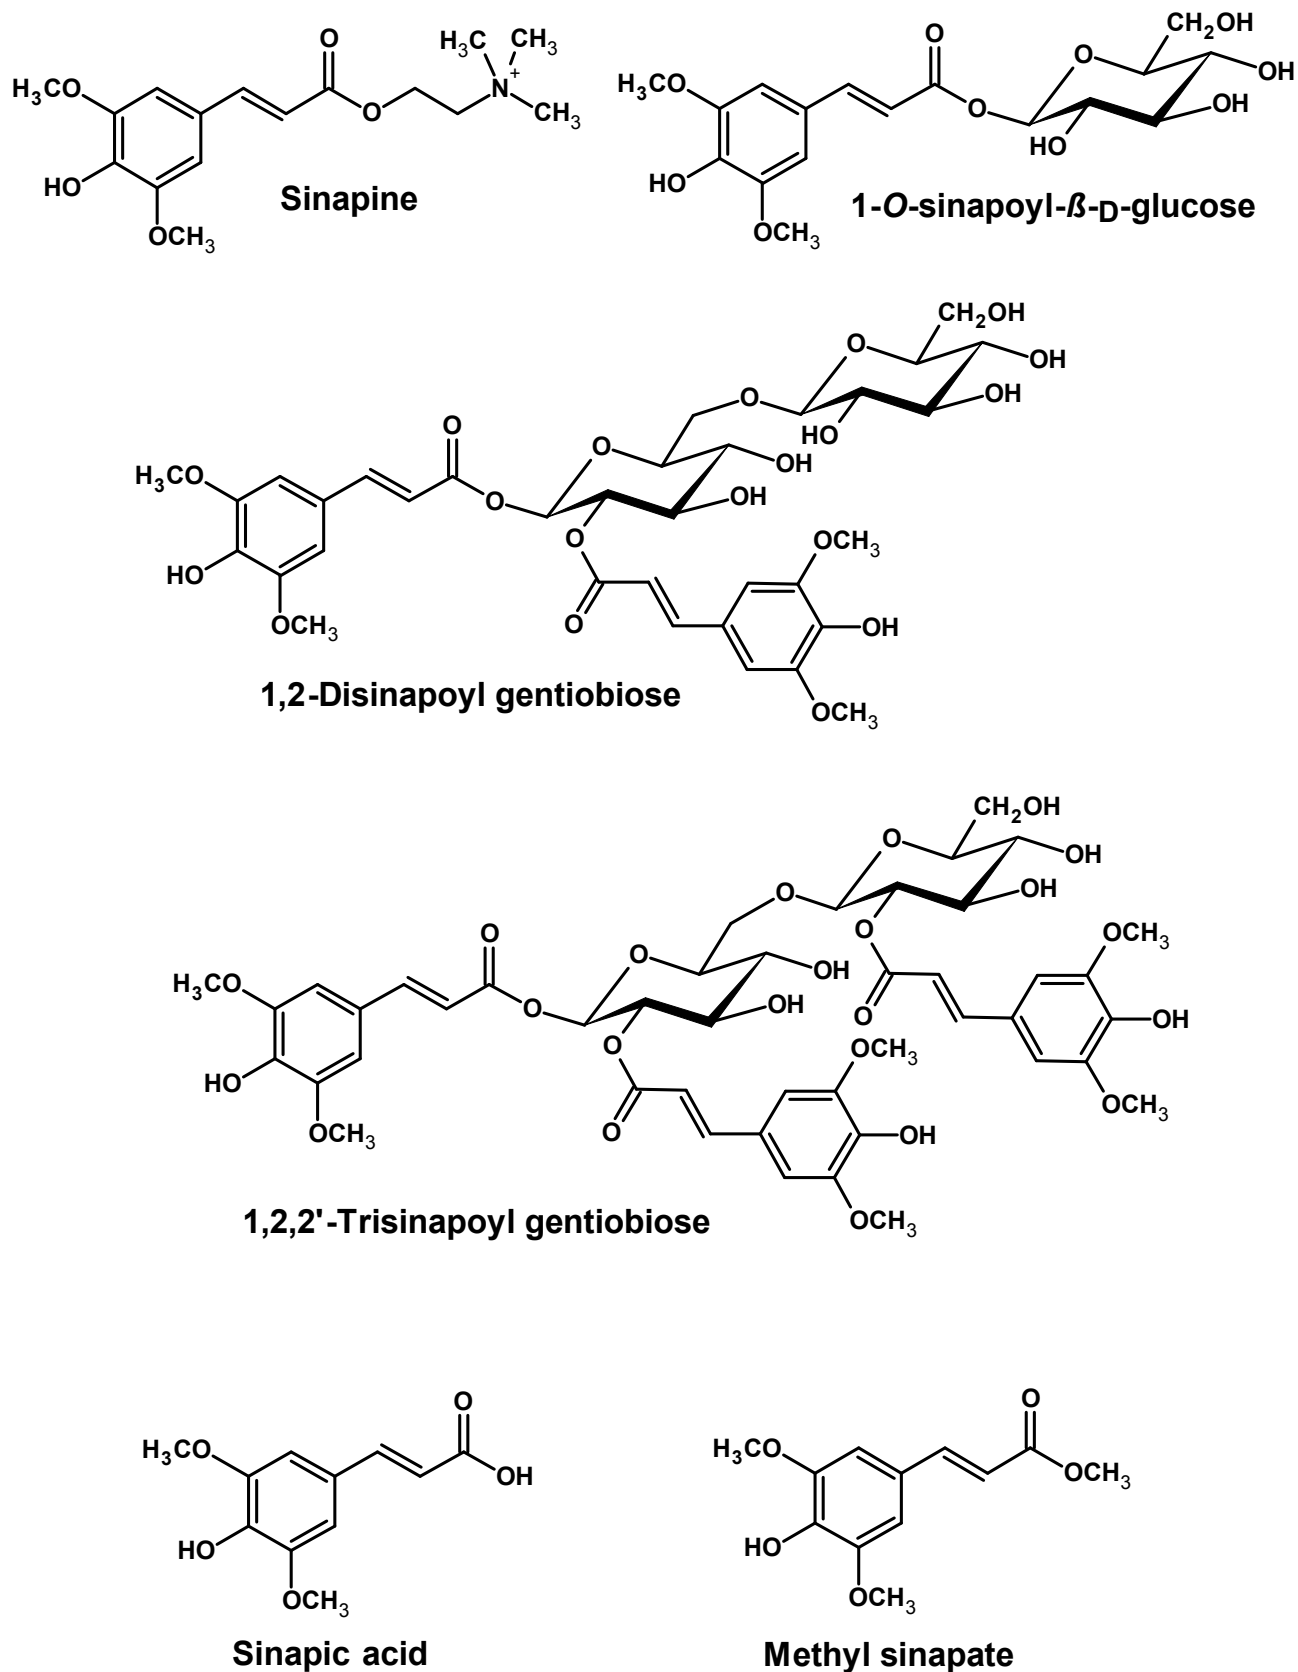

**Fig. S1.** Model structures of sinapic acid derivatives identified in broccoli sprouts and seeds. In real samples the substitution pattern of sinapoyl moieties in isomeric sinapate sugar esters is unassigned (Table 1).
